# Supplementary material for: Genome-Wide Identification and Expression Analysis of Cysteine-Rich Polycomb-like Protein (CPP) Gene Family in Tomato
Source: MDPI journal article supplement (doi:10.3390/ijms24065762), 2023-03-17
Supplement: s1 [file s1]

Supplementary Table S1: Gene descriptions and protein characteristics of 6 members of CPP gene family in tomato.

| Gene name     | Gene ID                 | CDS length (bp) | Chr | Position (5'-3')  | Protein length (aa) | Protein characteristics |                |                   |                 |        | Subcellular location |
|---------------|-------------------------|-----------------|-----|-------------------|---------------------|-------------------------|----------------|-------------------|-----------------|--------|----------------------|
|               |                         |                 |     |                   |                     | MW (kDa)                | Theoretical pI | Instability Index | Aliphatic Index | GRAVY  |                      |
| <i>SICPP1</i> | <i>Solyc01g079390.3</i> | 1734            | 1   | 78333325-78341795 | 577                 | 64.60                   | 8.43           | 42.54             | 59.36           | -0.793 | Nucleus              |
| <i>SICPP2</i> | <i>Solyc03g044380.3</i> | 2766            | 3   | 8971764-8981370   | 921                 | 102.90                  | 8.42           | 52.74             | 64.60           | -0.767 | Nucleus              |
| <i>SICPP3</i> | <i>Solyc07g020710.3</i> | 1713            | 7   | 13274624-13291578 | 570                 | 61.99                   | 7.48           | 48.30             | 70.54           | -0.609 | Nucleus              |
| <i>SICPP4</i> | <i>Solyc08g067150.3</i> | 2922            | 8   | 56136445-56144614 | 973                 | 104.73                  | 6.14           | 57.47             | 69.11           | -0.591 | Nucleus              |
| <i>SICPP5</i> | <i>Solyc09g082505.1</i> | 915             | 9   | 68646637-68648720 | 304                 | 33.02                   | 8.53           | 66.02             | 59.08           | -0.553 | Nucleus              |
| <i>SICPP6</i> | <i>Solyc12g007180.2</i> | 1857            | 12  | 1616338-1626340   | 618                 | 67.06                   | 8.19           | 52.32             | 62.36           | -0.618 | Nucleus              |

Abbreviations: MW, Molecular weight; GRAVY, Grand average of hydropathicity.
